# Supplementary material for: Kinetic stability modulation of polymeric nanoparticles for enhanced detection of influenza virus via penetration of viral fusion peptides
Source: Royal Society of Chemistry journal article supplement (doi:10.1039/d1tb01847g), 2021-01-01
Supplement: d1tb01847g1.pdf [file d1tb01847g1.pdf]

## Supporting Information

### **Kinetic Stability Modulation of Polymeric Nanoparticles for Enhanced Detection of Influenza Virus via Penetration of Viral Fusion Peptides**

Chaewon Park,<sup>a</sup> Jong-Woo Lim,<sup>a</sup> Geunseon Park,<sup>a</sup> Hyun-Ouk Kim,<sup>b</sup> Sojeong Lee,<sup>a</sup> Yuri H. Kwon,<sup>a</sup> Seong-Eun Kim,<sup>c</sup> Minjoo Yeom,<sup>d</sup> Woonsung Na,<sup>e,f</sup> Daesub Song,<sup>d</sup> Eunjung Kim\*<sup>g</sup> and Seungjoo Haam\*<sup>a</sup>

<sup>a</sup>Department of Chemical and Biomolecular Engineering, Yonsei University, Seoul 03722, Republic of Korea

<sup>b</sup>Division of Chemical Engineering and Bioengineering College of Art, Kangwon National University, Chuncheon 24341, Republic of Korea

<sup>c</sup>Huvet Bio Inc., Seoul 05836, Republic of Korea

<sup>d</sup>College of Pharmacy, Korea University, Sejong 30019, Republic of Korea

<sup>e</sup>College of Veterinary Medicine, Chonnam National University, Gwangju 61186, Republic of Korea

<sup>f</sup>Animal Medical Institute, Chonnam National University, Gwangju 61186, Republic of Korea

<sup>g</sup>Division of Bioengineering, Incheon National University, Incheon 22012, Republic of Korea

## 1. Characterization of Leu-NCA

Leucine *N*-carboxyanhydride (Leu-NCA) was synthesized using triphosgene. The chemical structure of Leu-NCA was verified using FT-IR and  $^1\text{H}$  NMR spectroscopy (**Fig. S1**). In the FT-IR spectra, two prominent characteristic peaks appear at  $1800\text{ cm}^{-1}$  and  $3331\text{ cm}^{-1}$ , which correspond to the carbonyl (C=O) and secondary amine (-NH-) groups of the anhydride ring of Leu-NCA, respectively. The  $^1\text{H}$  NMR spectra of the Leu-NCA showed chemical shifts at 6.05 ppm and 1.01 ppm, which can be assigned to protons of secondary amine (-NH-) and protons of methyl groups ( $(\text{CH}_3)_2$ ) in the leucine residues, respectively. As shown in **Fig. S1c**, all proton peaks of *D,L*-leucine and Leu-NCA are identified and assigned in their  $^1\text{H}$  NMR spectra.

## 2. Characterization of mPEG-*b*-pLeu

The successful synthesis of methoxypolyethylene glycol-*block*-polyleucine (mPEG-*b*-pLeu) was confirmed by FT-IR analysis (**Fig. S2b and S2e**). The characteristic peaks in the FT-IR spectra are as follows: alkyl C-H stretching and deformation peaks at  $2953$ ,  $2871$ , and  $1467\text{ cm}^{-1}$ ; N-H stretching vibration at  $3300\text{ cm}^{-1}$ ; amide I vibration at  $3060\text{ cm}^{-1}$ ; C=O stretching vibration at  $1654\text{ cm}^{-1}$ ; N-H bending and C-N stretching vibration (amide II) at  $1542\text{ cm}^{-1}$ .

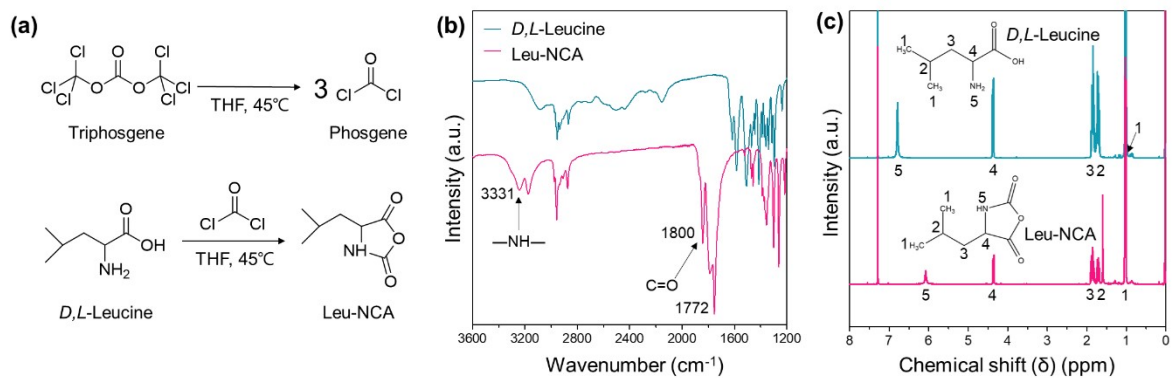

**Fig. S1** (a) Schematic of the synthesis of Leu-NCA using triphosgene in anhydrous tetrahydrofuran (THF). (b) FT-IR and (c) <sup>1</sup>H NMR spectra of *D,L*-Leucine and Leu-NCA. Chloroform-*d* was used in the NMR measurements.

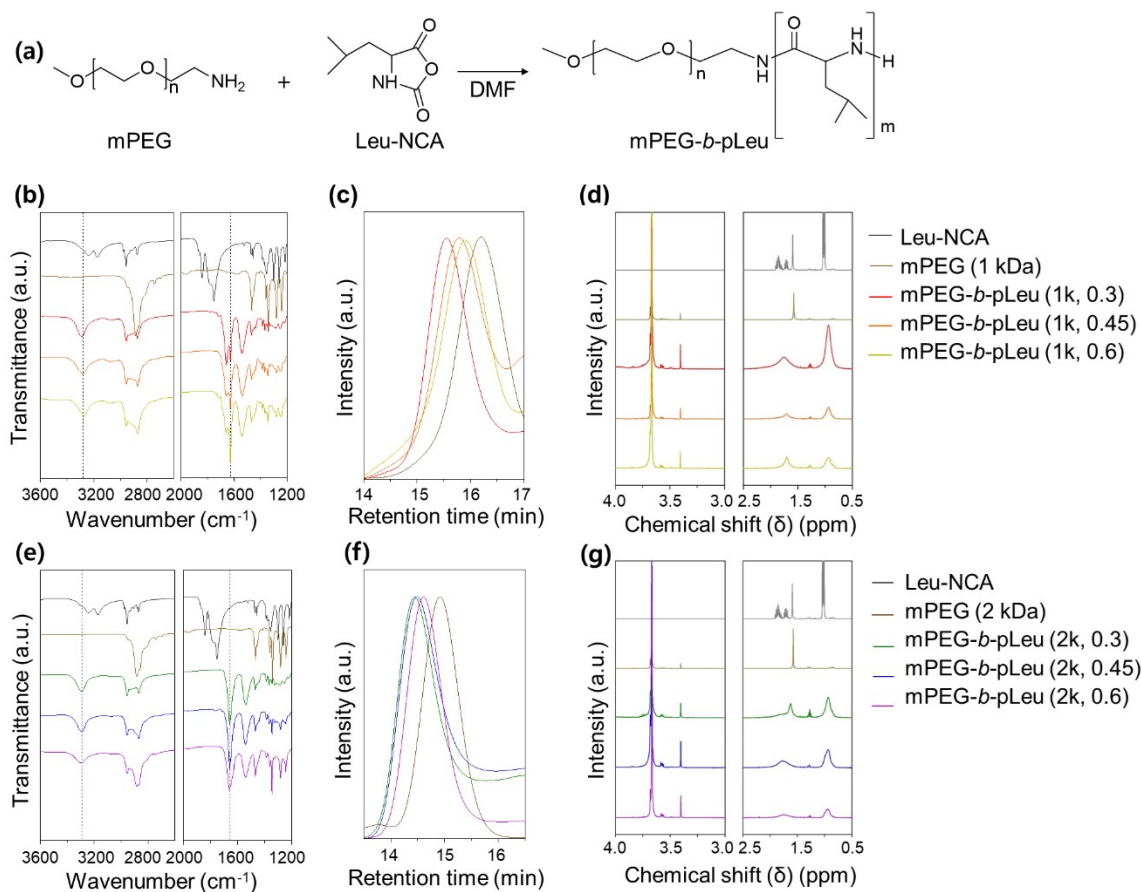

**Fig. S2** (a) Schematic of the synthesis of mPEG-*b*-pLeu copolymers using ring-opening polymerization of Leu-NCA. (b–g) Characterization of mPEG-*b*-pLeu copolymers synthesized with 1kDa and 2kDa of mPEG: (b, e) FT-IR spectra, (c, f) GPC traces with anhydrous tetrahydrofuran as mobile phase, and (d, g) <sup>1</sup>H NMR spectra in the presence of chloroform-*d*.

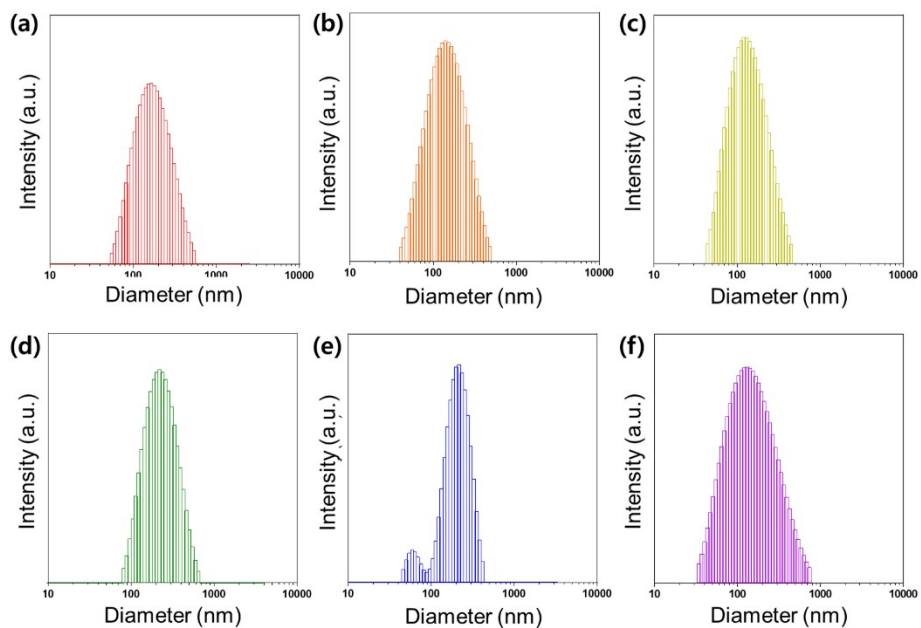

**Fig. S3** Hydrodynamic size distributions of PNPs determined by DLS: (a) PNP (1k, 0.3), (b) PNP (1k, 0.45), (c) PNP (1k, 0.6), (d) PNP (2k, 0.3), (e) PNP (2k, 0.45), and (f) PNP (2k, 0.6).

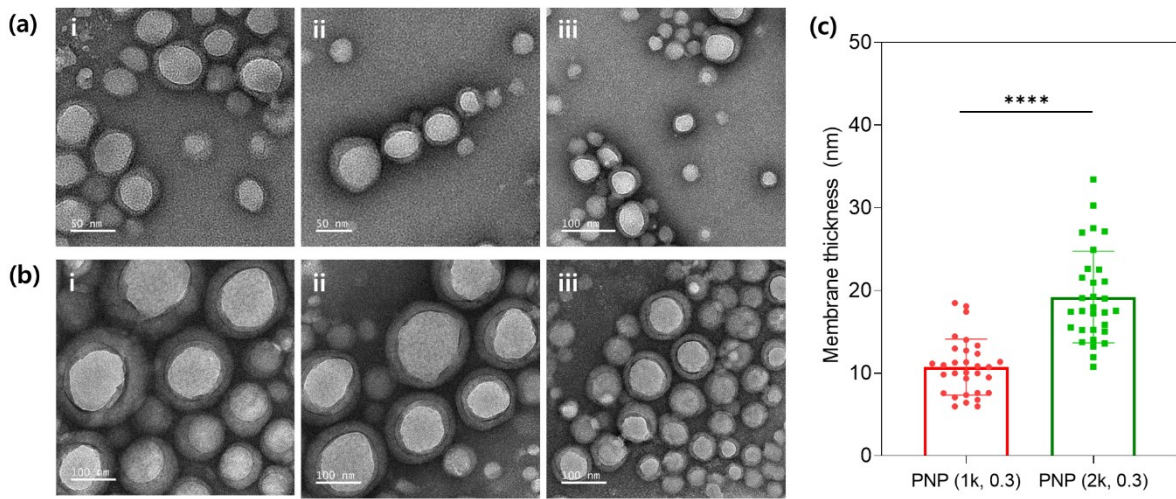

**Fig. S4** Representative TEM images of (a) PNP (1k, 0.3) and (b) PNP (2k, 0.3) with negative staining using 3% (w/v) of neutral phosphotungstic acid. (c) Membrane thicknesses of PNP (1k, 0.3) and PNP (2k, 0.3) measured from TEM images. Data represent mean  $\pm$  standard deviation for the size analysis over 31 particles per PNP. Statistical p-value between two groups is determined using Student's t-test ( $n = 31$ , \*\*\*\* $p < 0.0001$ ).

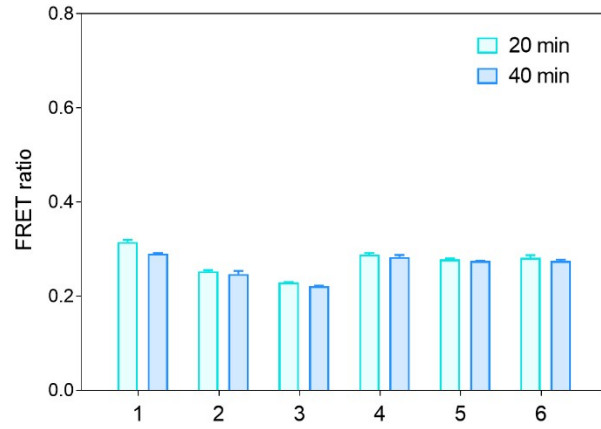

**Fig. S5** FRET ratios of the PNPs after 20 and 40 min incubation with 10% (v/v) of Triton X-100 solution. Samples are: 1: PNP (1k, 0.3), 2: PNP (1k, 0.45), 3: PNP (1k, 0.6), 4: PNP (2k, 0.3), 5: PNP (2k, 0.45), and 6: PNP (2k, 0.6). Data represent mean  $\pm$  standard deviation ( $n = 3$ ).

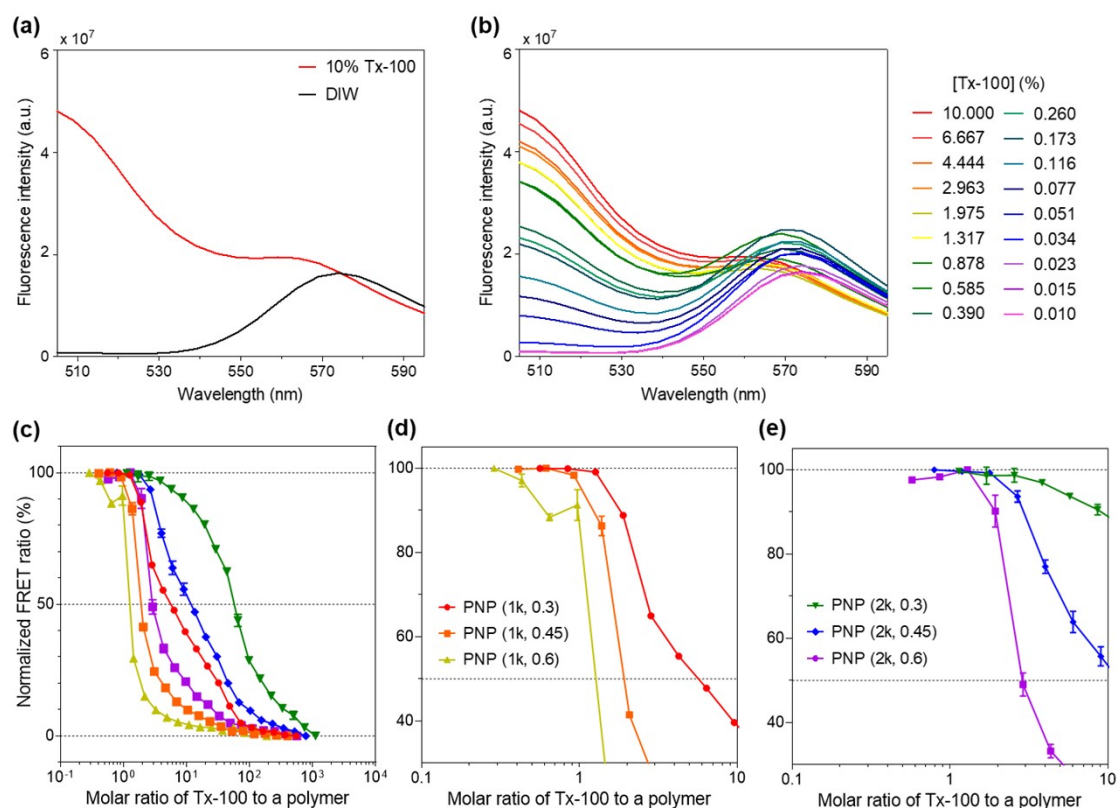

**Fig. S6** Solubilization assay. (a) Emission fluorescence spectra of PNP (1k, 0.3) before and after treatment with 10% (v/v) Triton X-100 (Tx-100) (excitation at 475 nm). (b) Representative emission fluorescence spectra of PNP (1k, 0.3) treated with various concentrations of Tx-100 (0.01-10%). (c-e) Normalized FRET ratios of a series of PNPs with increasing amounts of Tx-100 after 40 min: FRET signal profiles of (c) all PNPs, and magnified profiles of (d) PNP (1k) and (e) PNP (2k) in the range of 0.1 to 10 molar ratio of Tx-100 to a polymer. The maximum and minimum FRET ratios were normalized to 100% and 0% FRET ratios, respectively. All fluorescence measurements were carried out after 40 min incubation with Tx-100 at room temperature. Data represent mean  $\pm$  standard deviation ( $n = 3$ ).



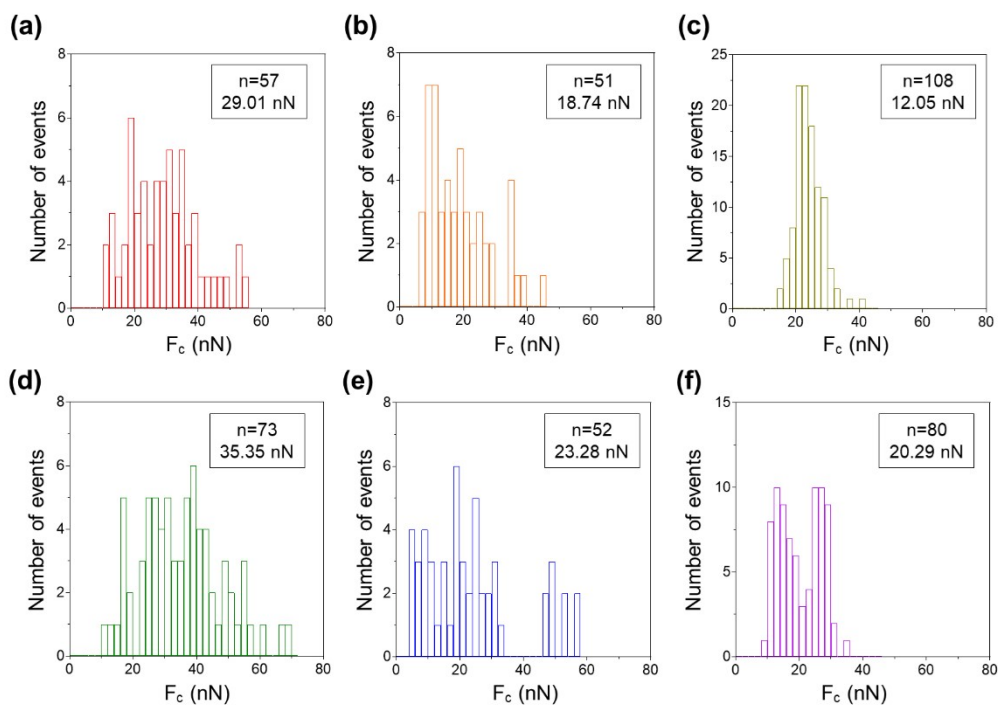

**Fig. S7** Histogram of the critical force for initiating PNP rupture ( $F_c$ ) of (a) PNP (1k, 0.3), (b) PNP (1k, 0.45), (c) PNP (1k, 0.6), (d) PNP (2k, 0.3), (e) PNP (2k, 0.45), and (f) PNP (2k, 0.6) measured by AFM-based nanoindentation tests. The insets represent the number of measurements ( $n$ ) and the estimated average  $F_c$  values.

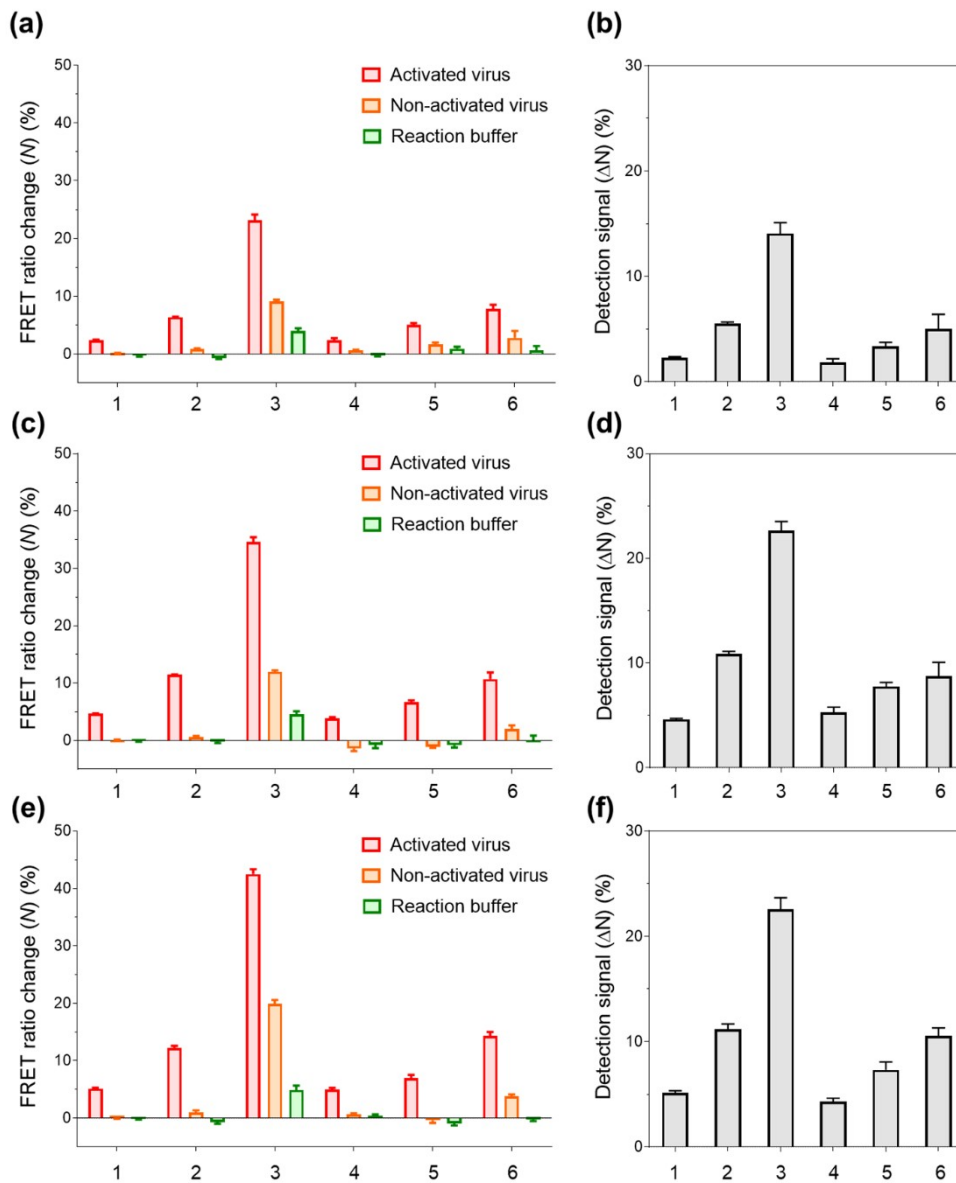

**Fig. S8** Influenza virus detection with PNPs. FRET ratio changes ( $N$ ) of PNPs after incubation with (a) CA04(H1N1) ( $10^{6.375}$  TCID<sub>50</sub> mL<sup>-1</sup>), (c) H4N6 ( $10^{4.5}$  TCID<sub>50</sub> mL<sup>-1</sup>), and (e) H6N8 ( $10^{5.625}$  TCID<sub>50</sub> mL<sup>-1</sup>) viruses. Each PNP was incubated with activated viruses in the presence of trypsin and acidic buffer (red), non-activated viruses in the absence of trypsin and acidic buffer (orange), and in a solution containing trypsin and acidic reaction buffer (green). Detection signals obtained from the fusion assay with (b) CA04(H1N1), (d) H4N6, and (f) H6N8 viruses. The average detection signals ( $\Delta N$ ) were obtained by subtracting FRET ratio changes of the activated groups from non-activated virus groups. Samples are: 1: PNP (1k, 0.3), 2: PNP (1k, 0.45), 3: PNP (1k, 0.6), 4: PNP (2k, 0.3), 5: PNP (2k, 0.45), and 6: PNP (2k, 0.6). Box plots represent mean  $\pm$  standard deviation ( $n = 3$ ).

**Table S1.** Various nanomaterial-based techniques for the detection of influenza viruses

| Nanomaterial                | Technique                | Analyte                           | Detection signal      | Detection time     | Limit of detection                                                             | Ref        |
|-----------------------------|--------------------------|-----------------------------------|-----------------------|--------------------|--------------------------------------------------------------------------------|------------|
| PNPs                        | Membrane fusion assay    | Influenza A virus (4 subtypes)    | Fluorescence          | 30 min             | $10^{2.08}$ TCID <sub>50</sub> /mL                                             | This study |
| Carbon nanoparticles        | Lateral flow immunoassay | Influenza A virus (H1N1 and H3N2) | Colorimetric signal   | 15-20 min          | $10^{2.5}$ TCID <sub>50</sub> /mL                                              | [1]        |
| AuNP coated PS spheres      | Lateral flow immunoassay | Influenza A (H3)                  | Colorimetric signal   | 5 min              | $10^{1.49}$ TCID <sub>50</sub> /mL                                             | [2]        |
| UCNPs                       | Lateral flow immunoassay | Avian influenza virus             | Fluorescence          | 20 min             | $10^2$ EID <sub>50</sub> /mL (H5N2)<br>$10^{3.5}$ EID <sub>50</sub> /mL (H5N6) | [3]        |
| PGMA-coated PS nanoparticle | Size measurement         | Influenza A virus (H1N1 and H3N2) | Diameter distribution | > 1 h              | 100 pfu/mL or $10^{2.16}$ TCID <sub>50</sub> /mL*                              | [4]        |
| PANi-encapsulated PNPs      | Virus-ligand binding     | Influenza A virus (H1N1)          | Colorimetric signal   | 15 min             | $10^{3.37}$ TCID <sub>50</sub> /mL                                             | [5]        |
| PDA nanoparticles           | Virus-ligand binding     | Influenza A virus (H1N1)          | Colorimetric signal   | 5 min              | $10^5$ pfu                                                                     | [6]        |
| AuNPs                       | Virus-ligand binding     | Influenza virus (14 subtypes)     | Colorimetric signal   | 90 min             | 8 HA titer                                                                     | [7]        |
| AuNPs and CNTs              | ELISA                    | Influenza A virus (H3N2)          | Colorimetric signal   | > 9 h <sup>a</sup> | 10 pfu/mL or $10^{1.15}$ TCID <sub>50</sub> /mL <sup>b</sup>                   | [8]        |

<sup>a</sup>The pfu/mL value was divided by a factor of 0.7 to obtain the TCID<sub>50</sub>/mL value for approximate comparison.<sup>[9]</sup>

<sup>b</sup>Overnight process was assumed as 6 hours or more.

Abbreviations: PNPs, polymeric nanoparticles; AuNP, gold nanoparticles; PS, polystyrene; UCNPs, upconversion nanoparticles; PGMA, poly(methyl methacrylate); PANi, poly(aniline-co-pyrrole); PDA, polydiacetylene; CNTs, carbon nanotubes; ELISA, enzyme-linked immunosorbent assay; HA, hemagglutinin.

## References

- [1] N. Wiriyachaiorn, H. Sirikett, W. Maneepakorn, T. Dharakul, *Microchim. Acta* 2017, **184**, 1827-1835.
- [2] X. Liu, J. Yang, Q. Li, Y. Wang, Y. Wang, G. Li, J. Shi, P. Ding, J. Guo, R. Deng, G. Zhang, *Microchim. Acta* 2020, **187**, 1-7.
- [3] J. Kim, J. H. Kwon, J. Jang, H. Lee, S. Kim, Y. K. Hahn, S. K. Kim, K. H. Lee, S. Lee, H. Pyo, C.-S. Song, J. Lee, *Biosens. Bioelectron.* 2018, **112**, 209-215.
- [4] T. Matsubara, A. Kubo, T. Sato, *Polym. J.* 2020, **52**, 261-266.
- [5] G. Park, H.-O. Kim, J.-W. Lim, C. Park, M. Yeom, D. Song, S. Haam, *Nano Res.* 2021, 1-9.
- [6] S. Song, K. Ha, K. Guk, S. G. Hwang, J. M. Choi, T. Kang, P. Bae, J. Jung, E.-K. Lim, *RSC Adv.* 2016, **6**, 48566-48570.
- [7] L. Zheng, J. Wei, X. Lv, Y. Bi, P. Wu, Z. Zhng, P. Wang, R. Liu, J. Jiang, H. Cong, J. Liang, W. Chen, H. Cao, W. Liu, G. F. Gao, Y. Du, X. Jiang, X. Li, *Biosens. Bioelectron.* 2017, **91**, 46-52.
- [8] S. R. Ahmed, J. Kim, T. Suzuki, J. Lee, E. Y. Park, *Biosens. Bioelectron.* 2016, **85**, 503-508.
- [9] P. J. Jannetto, B. W. Buchan, K. A. Vaughan, J. S. Ledford, D. K. Anderson, D. C. Henley, N. B. Quigley, N. A. Ledebuer, *J. Clin. Microbiol.* 2010, **48**, 3997-4002.
